# Supplementary material
Source: PubMed Central journal article supplement (PMC3070553)

A

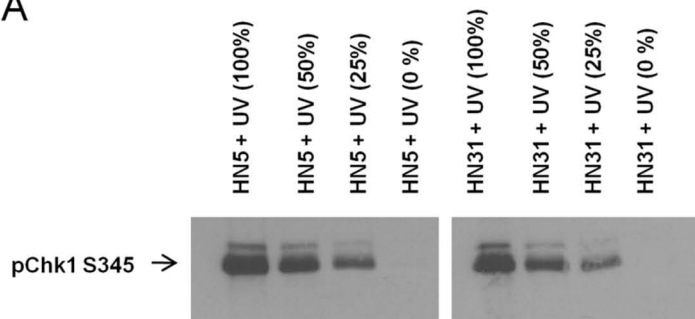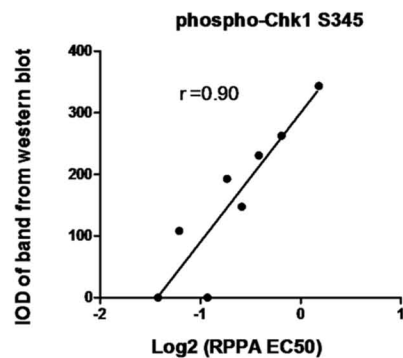

B

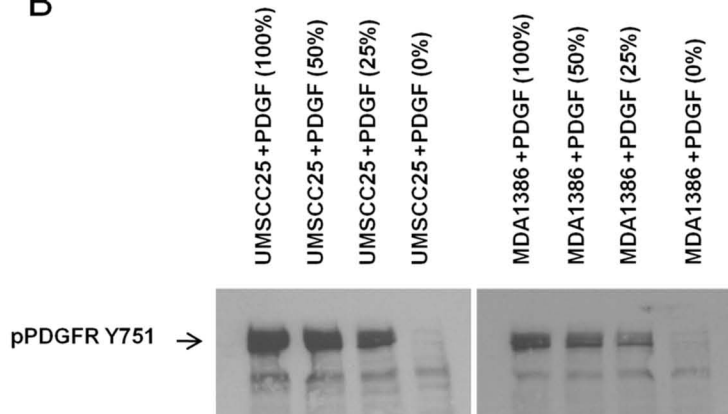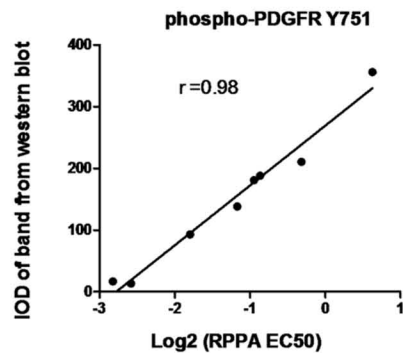

Supplement: mmc4.pdf [file mmc4.pdf]

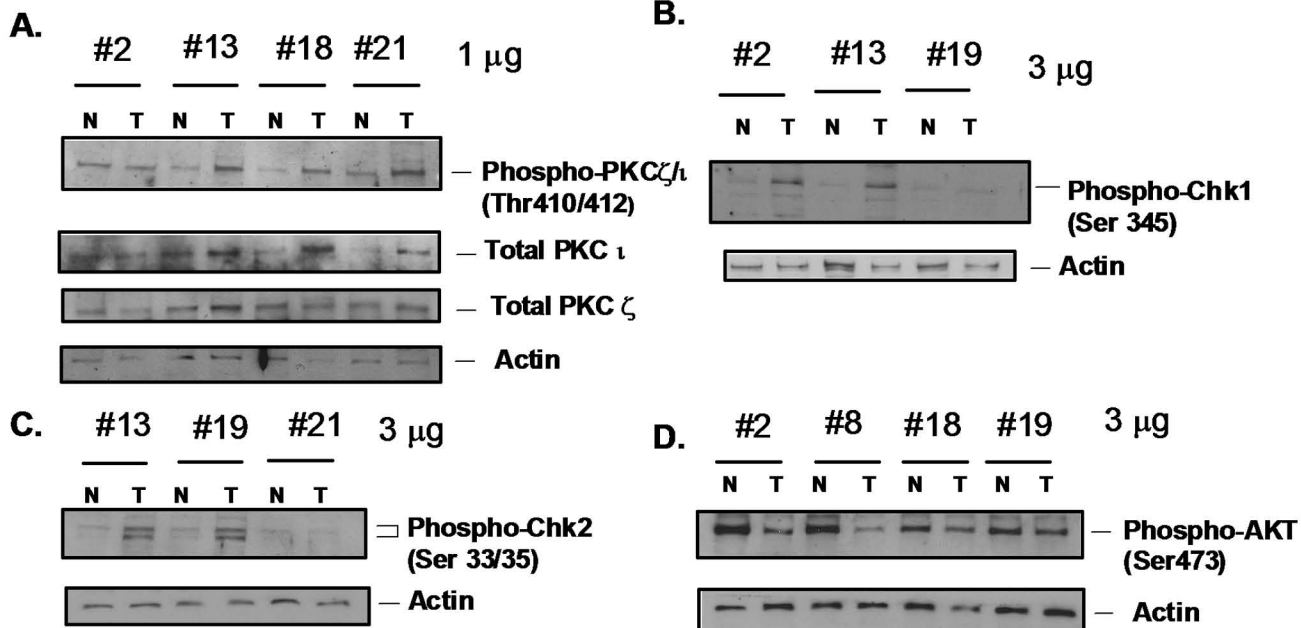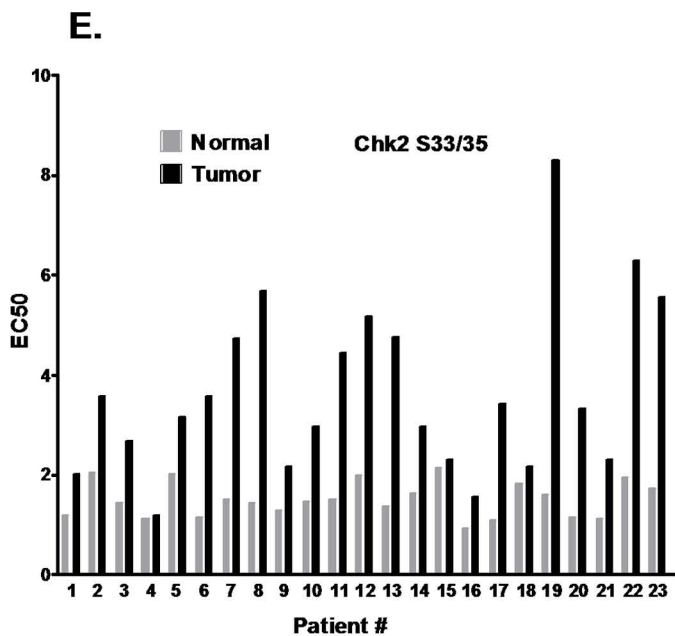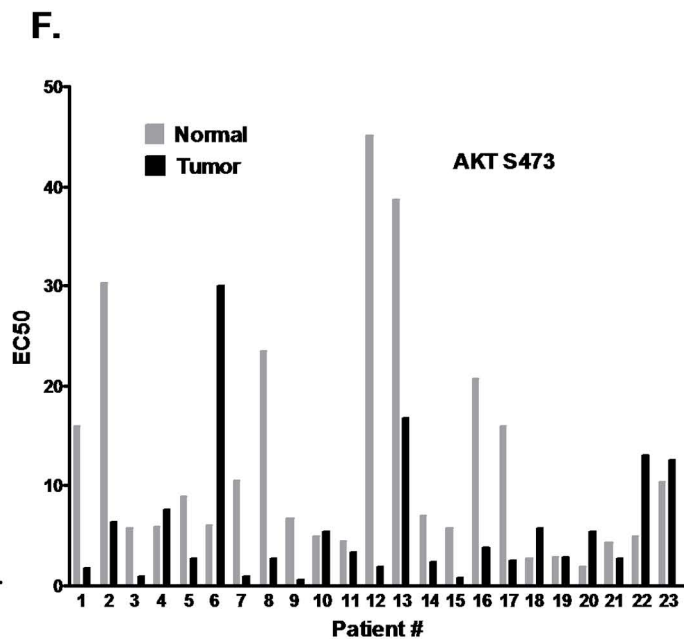

Supplement: mmc5.pdf [file mmc5.pdf]

**A**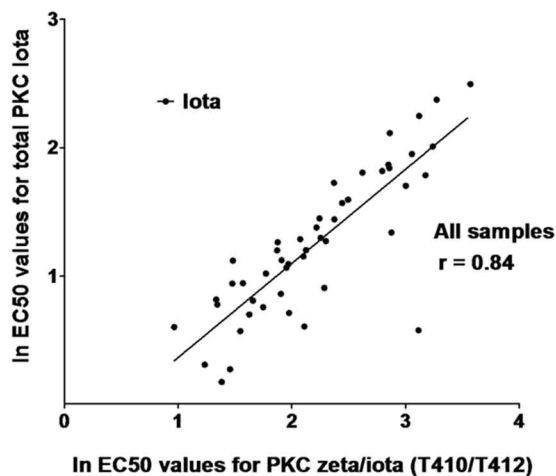**B**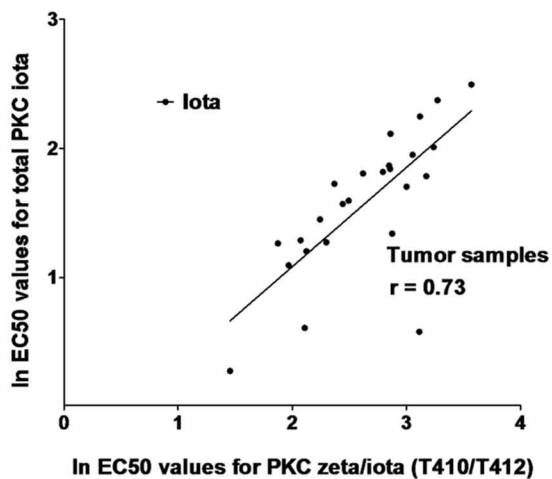**C**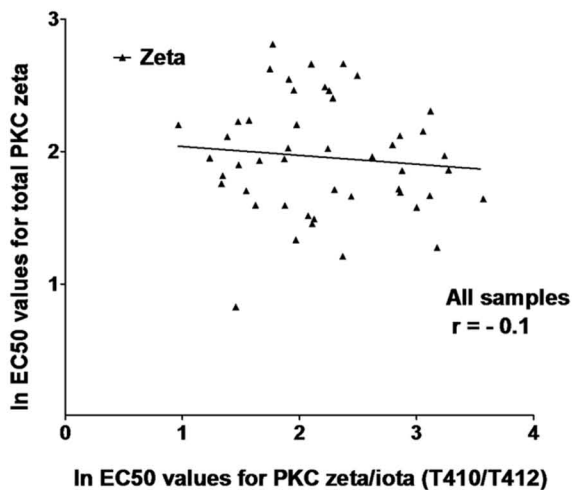**D**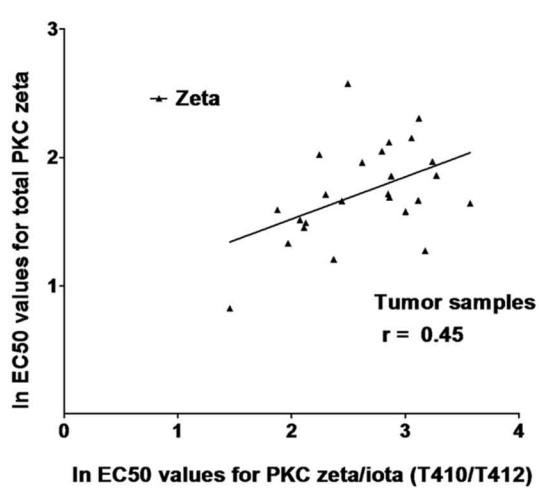

Supplement: mmc6.pdf [file mmc6.pdf]
